# Supplementary material
Source: MDPI journal article supplement (https://www.mdpi.com/2075-163X/9/2/95)
Supplement: s1 [file s1]

# Evaluating Metal Criticality for Low-Carbon Power Generation Technologies in Japan

Wataru Miyamoto, Shoki Kosai and Seiji Hashimoto

Number of pages (12), Number of Figures (9) and Number of Tables (2)

## Supplementary Materials

List of abbreviation

|        |                                                                                       |
|--------|---------------------------------------------------------------------------------------|
| A-USC  | Advanced Ultra-Supercritical Coal                                                     |
| CdTe   | Cadmium Telluride solar cell                                                          |
| CIGS   | Copper-Indium-Gallium Diselenide solar cell                                           |
| CMF    | Companion Metal Fraction                                                              |
| EI     | Environmental Impact                                                                  |
| GDP    | Gross Domestic Product                                                                |
| GP     | Geopolitical                                                                          |
| GSC    | Global Supply Concentration                                                           |
| GTCC   | Gas Turbine Combined Cycle                                                            |
| GTE    | Geological, Technological and Economic                                                |
| HDI    | Human Development Index                                                               |
| HHI    | Herfindahl–Hirschman index                                                            |
| HREE   | Heavy Rare-Earth Elements                                                             |
| I      | Importance                                                                            |
| IR     | Import Reliance                                                                       |
| LNG    | Liquid Natural Gas                                                                    |
| NE     | National Economic Importance                                                          |
| PPI    | Policy Perception Index                                                               |
| PPU    | Percentage of Population Utilizing                                                    |
| RP     | Reserve to Production ratio                                                           |
| $RP_t$ | RP transformed                                                                        |
| S      | Substitutability                                                                      |
| SA     | Substitute Availability                                                               |
| S&R    | Social & Regulatory                                                                   |
| SP     | Substitute Performance                                                                |
| SR     | Supply Risk                                                                           |
| SU     | Susceptibility                                                                        |
| UNDP   | United Nations Development Programme                                                  |
| VSR    | Vulnerability to Supply Restriction                                                   |
| WGI-PV | Worldwide Governance Indicators - Political Stability & Absence of Violence/Terrorism |

List of subscript

|          |                  |
|----------|------------------|
| <i>i</i> | Metal            |
| <i>j</i> | Country          |
| <i>k</i> | Substitute metal |
| <i>t</i> | Technology       |

| Elements | Supply Risk                            |     |                                     |     |                                     |     |                                     |     |                                     |     | SR |
|----------|----------------------------------------|-----|-------------------------------------|-----|-------------------------------------|-----|-------------------------------------|-----|-------------------------------------|-----|----|
|          | Geological, Technological and Economic |     | Social & Regulatory                 |     |                                     |     | Geopolitical                        |     |                                     |     |    |
|          | RPt                                    | CMF | Weighted                            | PPI | Weighted                            | HDI | Weighted                            | WGI | Weighted                            | GSC |    |
| B        | 53                                     | 0   | Boron (all forms) Mine Production   | 32  | Boron (all forms) Mine Production   | 77  | Boron (all forms) Mine Production   | 79  | Boron (all forms) Mine Production   | 88  | 55 |
| Mg       | 0                                      | 5   | Magnesium Primary Production        | 54  | Magnesium Primary Production        | 75  | Magnesium Primary Production        | 70  | Magnesium Primary Production        | 94  | 50 |
| Ti       | 0                                      | 0   | Ilmenite and Rutile Mine Production | 38  | Ilmenite and Rutile Mine Production | 73  | Ilmenite and Rutile Mine Production | 51  | Ilmenite and Rutile Mine Production | 59  | 37 |
| V        | 0                                      | 82  | Vanadium Mine Production            | 53  | Vanadium Mine Production            | 73  | Vanadium Mine Production            | 71  | Vanadium Mine Production            | 84  | 60 |
| Cr       | 94                                     | 0   | Chromite Mine Production            | 41  | Chromite Mine Production            | 70  | Chromite Mine Production            | 67  | Chromite Mine Production            | 76  | 58 |
| Mn       | 83                                     | 3   | Manganese Mine Production           | 42  | Manganese Mine Production           | 73  | Manganese Mine Production           | 55  | Manganese Mine Production           | 68  | 54 |
| Co       | 62                                     | 85  | Cobalt Mine Production              | 51  | Cobalt Refining Production          | 77  | Cobalt Mine Production              | 75  | Cobalt Mine Production              | 78  | 71 |
| Ni       | 85                                     | 0   | Nickel Mine Production              | 47  | Nickel Mine Production              | 77  | Nickel Mine Production              | 57  | Nickel Mine Production              | 58  | 54 |
| Ga       | 0                                      | 100 | Bauxite Mine Production             | 40  | Gallium Refining Production         | 75  | Gallium Refining Production         | 69  | Gallium Refining Production         | 88  | 62 |
| Se       | 87                                     | 100 | Copper Mine Production              | 29  | Selenium Refining Production        | 82  | Selenium Refining Production        | 45  | Selenium Refining Production        | 70  | 69 |
| Y        | 0                                      | 84  | Yttrium Mine Production             | 57  | Yttrium Mine Production             | 73  | Yttrium Mine Production             | 71  | Yttrium Mine Production             | 100 | 64 |
| Zr       | 65                                     | 100 | Zirconium Mine Production           | 37  | Zirconium Mine Production           | 78  | Zirconium Mine Production           | 44  | Zirconium Mine Production           | 75  | 67 |
| Nb       | 37                                     | 2   | Niobium Mine Production             | 38  | Niobium Mine Production             | 77  | Niobium Mine Production             | 52  | Niobium Mine Production             | 96  | 51 |
| Mo       | 80                                     | 46  | Molybdenum Mine Production          | 36  | Molybdenum Mine Production          | 80  | Molybdenum Mine Production          | 55  | Molybdenum Mine Production          | 74  | 62 |
| Ag       | 92                                     | 71  | Silver Mine Production              | 36  | Silver Mine Production              | 78  | Silver Mine Production              | 62  | Silver Mine Production              | 59  | 66 |
| In       | 96                                     | 100 | 80% Zinc, 15% Tin, 5% Copper        | 42  | Indium Refining Production          | 80  | Indium Refining Production          | 55  | Indium Refining Production          | 81  | 76 |
| Te       | 0                                      | 100 | Copper Mine Production              | 29  | Tellurium Refining Production       | 88  | Tellurium Refining Production       | 39  | Tellurium Refining Production       | 73  | 55 |
| Nd       | 0                                      | 95  | Neodymium Mine Production           | 55  | Neodymium Mine Production           | 74  | Neodymium Mine Production           | 68  | Neodymium Mine Production           | 97  | 65 |
| Dy       | 0                                      | 94  | Dysprosium Mine Production          | 57  | Dysprosium Mine Production          | 73  | Dysprosium Mine Production          | 71  | Dysprosium Mine Production          | 100 | 66 |
| Hf       | 0                                      | 100 | Zirconium Mine Production           | 37  | Zirconium Mine Production           | 78  | Zirconium Mine Production           | 44  | Zirconium Mine Production           | 75  | 56 |
| Ta       | 28                                     | 50  | Tantalum Mine Production            | 49  | Tantalum Mine Production            | 55  | Tantalum Mine Production            | 67  | Tantalum Mine Production            | 79  | 55 |
| W        | 81                                     | 5   | Tungsten Mine Production            | 55  | Tungsten Mine Production            | 73  | Tungsten Mine Production            | 68  | Tungsten Mine Production            | 93  | 62 |
| Pb       | 94                                     | 0   | Lead Mine Production                | 43  | Lead Refining Production            | 79  | Lead Mine Production                | 60  | Lead Mine Production                | 78  | 59 |
| Al       | 0                                      | 0   | Bauxite Mine Production             | 40  | Alumina Refining Production         | 78  | Bauxite Mine Production             | 52  | Bauxite Mine Production             | 71  | 40 |
| Fe       | 90                                     | 0   | Iron Mine Production                | 43  | Raw steel Production                | 77  | Iron Mine Production                | 56  | Iron Mine Production                | 77  | 57 |
| Cu       | 80                                     | 10  | Copper Mine Production              | 29  | Copper Refining Production          | 78  | Copper Smelting Production          | 55  | Copper Mine Production              | 64  | 53 |
| Zn       | 95                                     | 0   | Zinc Mine Production                | 41  | Zinc Smelting Production            | 79  | Zinc Mine Production                | 59  | Zinc Smelting Production            | 69  | 57 |
| Cd       | 92                                     | 100 | Zinc Mine Production                | 41  | Cadmium Refining Production         | 81  | Cadmium Refining Production         | 55  | Cadmium Refining Production         | 66  | 72 |
| Sn       | 94                                     | 0   | Tin Mine Production                 | 56  | Tin Smelting Production             | 74  | Tin Mine Production                 | 70  | Tin Mine Production                 | 72  | 61 |

Figure SA. The data used for evaluation Social & Regulatory and Geopolitical in Supply Risk.

| Elements | Vulnerability to Supply Restriction |          |            |                    |     |     |    |    |                |     |
|----------|-------------------------------------|----------|------------|--------------------|-----|-----|----|----|----------------|-----|
|          | End-use                             |          | Importance | Substitutability   |     |     |    |    | Susceptibility | VSR |
|          | Application                         | % of use | NE         | Primary substitute | SPi | SAi | SP | SA | IR             |     |
| B        | Ceramics and glass                  | 64%      | 0          | Na                 | 38  | 39  | 41 | 42 | 100            | 47  |
|          | Soaps, Detergents and bleaches      | 4%       |            | Na                 | 38  | 39  |    |    |                |     |
|          | Agriculture                         | 4%       |            | None               | 100 | 100 |    |    |                |     |
|          | other                               | 36%      |            |                    |     |     |    |    |                |     |
| Mg       | Refractory                          | 83%      | 2          | None               | 100 | 100 | 94 | 97 | 100            | 66  |
|          | Environmentary                      | 6%       |            | lime               | 13  | 46  |    |    |                |     |
|          | Agriculture                         | 5%       |            | None               | 100 | 100 |    |    |                |     |
|          | other                               | 6%       |            |                    |     |     |    |    |                |     |
| Ga       | Integrated circuits                 | 62%      | 1          | Si                 | 38  | 47  | 38 | 58 | 44             | 31  |
|          | Optoelectronic devices              | 38%      |            | In                 | 38  | 76  |    |    |                |     |
| Al       | Packaging                           | 11%      | 39         | Fe                 | 38  | 57  | 49 | 56 | 66             | 53  |
|          | Consumer durables                   | 12%      |            | Cu                 | 38  | 53  |    |    |                |     |
|          | Machinery                           | 2%       |            | Fe                 | 63  | 57  |    |    |                |     |
|          | Buildings and Constractions         | 14%      |            | Fe                 | 38  | 57  |    |    |                |     |
|          | Electrical                          | 4%       |            | Cu                 | 13  | 53  |    |    |                |     |
|          | Transportation                      | 43%      |            | Fe                 | 63  | 57  |    |    |                |     |
|          | other                               | 14%      |            |                    |     |     |    |    |                |     |

Figure SB1. The data of light metals used for evaluating Vulnerability to Supply Restriction.

| Elements | End-use                              |          | Importance | Substitutability     |     |     |    |    | Susceptibility | VSR |
|----------|--------------------------------------|----------|------------|----------------------|-----|-----|----|----|----------------|-----|
|          | Application                          | % of use |            | Primary substitute   | SPi | SAi | SP | SA | IR             |     |
| V        | Ferrovanadium                        | 98%      | 2          | Nb                   | 63  | 51  | 63 | 50 | 91             | 50  |
|          | Chemicals                            | 2%       |            | Pt                   | 88  | 47  |    |    |                |     |
| Cr       | Buildings and Infrastructure         | 25%      | 3          | Mn                   | 63  | 54  | 76 | 67 | 100            | 58  |
|          | Industrial Machinery                 | 25%      |            | None                 | 100 | 100 |    |    |                |     |
|          | Transportation                       | 15%      |            | Al                   | 63  | 40  |    |    |                |     |
|          | Household Appliances and Electronics | 5%       |            | Al                   | 63  | 40  |    |    |                |     |
|          | other                                | 30%      |            |                      |     |     |    |    |                |     |
| Mn       | Steel Metallurgy                     | 90%      | 3          | None                 | 100 | 100 | 96 | 97 | 100            | 66  |
|          | Non-Steel Alloys                     | 6%       |            | plastic <sup>a</sup> | 63  | 67  |    |    |                |     |
|          | Batteries                            | 2%       |            | Li                   | 13  | 42  |    |    |                |     |
|          | other                                | 2%       |            |                      |     |     |    |    |                |     |
| Nb       | Constraction                         | 29%      | 3          | V                    | 38  | 60  | 42 | 60 | 100            | 51  |
|          | Transportation                       | 24%      |            | V                    | 38  | 60  |    |    |                |     |
|          | Oil and Gas Industry                 | 24%      |            | V                    | 38  | 60  |    |    |                |     |
|          | Stainless steel                      | 10%      |            | Ta                   | 63  | 55  |    |    |                |     |
|          | Niobium Metal and Alloys             | 5%       |            | Mo                   | 63  | 62  |    |    |                |     |
|          | other                                | 8%       |            |                      |     |     |    |    |                |     |
| Fe       | Constraction                         | 22%      | 100        | Wood <sup>m</sup>    | 63  | 37  | 50 | 43 | 4              | 50  |
|          | Machinery: Industrial                | 5%       |            | plastic <sup>a</sup> | 63  | 67  |    |    |                |     |
|          | Machinery: Electrical                | 3%       |            | plastic <sup>a</sup> | 63  | 67  |    |    |                |     |
|          | Machinery: Appliances                | 1%       |            | plastic <sup>a</sup> | 63  | 67  |    |    |                |     |
|          | Transportation: Ship                 | 7%       |            | Al                   | 38  | 40  |    |    |                |     |
|          | Transportation: Cars                 | 23%      |            | Al                   | 38  | 40  |    |    |                |     |
|          | Transportation: Trains               | 0%       |            | Al                   | 38  | 40  |    |    |                |     |
|          | Transportation: others               | 0%       |            | Al                   | 38  | 40  |    |    |                |     |
|          | Products                             | 2%       |            | Al                   | 38  | 40  |    |    |                |     |
|          | other                                | 37%      |            |                      |     |     |    |    |                |     |

Figure SB2. The data of iron & its principal alloying metals used for evaluating Vulnerability to Supply Restriction.

<sup>a</sup> plastic are based on a weighted averaged of the score of natural gas (2/3 weight) and crude oil (1/3 weight) [22].

<sup>m</sup> Production data for roundwood are based on statistics by the Food and Agricultural Organization [76].

| Elements | End-use                              |          | Importance | Substitutability   |     |     |    |    | Susceptibility | VSR |
|----------|--------------------------------------|----------|------------|--------------------|-----|-----|----|----|----------------|-----|
|          | Application                          | % of use |            | Primary substitute | SPi | SAi | SP | SA | IR             |     |
| Ti       | Pigment(paints)                      | 53%      | 2          | Talc               | 63  | 41  | 63 | 41 | 99             | 51  |
|          | Pigment(plastics)                    | 19%      |            | Talc               | 63  | 41  |    |    |                |     |
|          | Pigment(paper)                       | 9%       |            | Talc               | 63  | 41  |    |    |                |     |
|          | other                                | 19%      |            |                    |     |     |    |    |                |     |
| Co       | Batteries                            | 80%      | 1          | Mn                 | 38  | 54  | 41 | 54 | 67             | 39  |
|          | Cemented carbides                    | 4%       |            | Ni                 | 63  | 54  |    |    |                |     |
|          | Superalloys                          | 8%       |            | Ni                 | 63  | 54  |    |    |                |     |
|          | Magnets                              | 1%       |            | Nd                 | 38  | 65  |    |    |                |     |
|          | Catalysts                            | 1%       |            | Ni                 | 38  | 54  |    |    |                |     |
|          | other                                | 6%       |            |                    |     |     |    |    |                |     |
| Ni       | Industrial Machinery                 | 31%      | 5          | steel <sup>b</sup> | 88  | 58  | 62 | 59 | 27             | 31  |
|          | Household Appliances and Metal goods | 28%      |            | steel <sup>c</sup> | 38  | 57  |    |    |                |     |
|          | Buildings and Infrastructure         | 17%      |            | steel <sup>d</sup> | 38  | 57  |    |    |                |     |
|          | Transportation: excluding aerospace  | 15%      |            | Al                 | 63  | 40  |    |    |                |     |
|          | Transportation: aerospace            | 4%       |            | None               | 100 | 100 |    |    |                |     |
|          | Electronics                          | 5%       |            | None               | 100 | 100 |    |    |                |     |
| Mo       | construction engineering steel       | 35%      | 8          | steel <sup>c</sup> | 63  | 53  | 70 | 62 | 94             | 56  |
|          | stainless steel                      | 25%      |            | steel <sup>e</sup> | 63  | 57  |    |    |                |     |
|          | tool and high speed steel            | 11%      |            | steel <sup>f</sup> | 63  | 58  |    |    |                |     |
|          | cast iron                            | 8%       |            | Fe                 | 63  | 57  |    |    |                |     |
|          | superalloys                          | 6%       |            | Nb                 | 88  | 51  |    |    |                |     |
|          | molybdenum metal                     | 6%       |            | None               | 100 | 100 |    |    |                |     |
|          | chemical                             | 10%      |            | None               | 100 | 100 |    |    |                |     |
| Ta       | Electronic components                | 48%      | 2          | Al                 | 38  | 40  | 41 | 47 | 86             | 44  |
|          | Sputtering targets                   | 11%      |            | Zr                 | 63  | 67  |    |    |                |     |
|          | Superalloys                          | 16%      |            | Nb                 | 38  | 51  |    |    |                |     |
|          | Machinery                            | 11%      |            | Nb                 | 38  | 51  |    |    |                |     |
|          | other                                | 14%      |            |                    |     |     |    |    |                |     |
| W        | Cemented carbides                    | 77%      | 0          | B                  | 38  | 55  | 38 | 57 | 83             | 43  |
|          | Steel                                | 16%      |            | Mo                 | 38  | 62  |    |    |                |     |
|          | Mill products                        | 4%       |            | Mo                 | 38  | 62  |    |    |                |     |
|          | other                                | 3%       |            |                    |     |     |    |    |                |     |

Figure SB3. The data of superalloy metals used for evaluating Vulnerability to Supply Restriction.

<sup>b</sup> AISI 444 (Cr: 18%, Mo: 2%, Fe: 80%) [60].

<sup>c</sup> AISI 430 (Cr: 17%, Fe: 83%) [60].

<sup>d</sup> AISI 410 (Cr: 12%, Mn: 1%, Fe: 87%) [60].

<sup>e</sup> AISI 304 (Cr: 18%, Ni: 8%, Mn: 2%, Fe: 72%) [60].

<sup>f</sup> T1(Cr: 4, W: 18, Fe: 78) [60].

| Elements | End-use                    |          | Importance | Substitutability   |                    |     |     |    | Susceptibility | VSR |
|----------|----------------------------|----------|------------|--------------------|--------------------|-----|-----|----|----------------|-----|
|          | Application                | % of use |            | NE                 | Primary substitute | SPi | SAi | SP |                |     |
| Se       | Glass manufacturing        | 29%      | 0          | Ce                 | 38                 | 62  | 38  | 61 | 1              | 17  |
|          | Chemicals and Pigments     | 6%       |            | Te                 | 38                 | 55  |     |    |                |     |
|          | other                      | 65%      |            |                    |                    |     |     |    |                |     |
| Ag       | Photography                | 22%      | 14         | Paper <sup>g</sup> | 63                 | 0   | 49  | 29 | 36             | 30  |
|          | Electrical and Electronics | 9%       |            | Cu                 | 88                 | 53  |     |    |                |     |
|          | Investment                 | 17%      |            | Au                 | 13                 | 55  |     |    |                |     |
|          | other                      | 52%      |            |                    |                    |     |     |    |                |     |
| Te       | Metallurgy                 | 45%      | 0          | Bi                 | 38                 | 77  | 38  | 61 | 58             | 36  |
|          | Solar cells                | 25%      |            | Si                 | 38                 | 47  |     |    |                |     |
|          | Rubber and Synthetic fiber | 20%      |            | Se                 | 38                 | 69  |     |    |                |     |
|          | Electronics                | 10%      |            | Se                 | 38                 | 69  |     |    |                |     |
| Cu       | Telecommunications         | 5%       | 50         | Si                 | 13                 | 47  | 73  | 47 | 4              | 38  |
|          | Electrical                 | 28%      |            | Al                 | 88                 | 40  |     |    |                |     |
|          | Automobiles                | 10%      |            | Al                 | 88                 | 40  |     |    |                |     |
|          | In-plant equipments        | 28%      |            | Fe                 | 63                 | 57  |     |    |                |     |
|          | Business electronics       | 7%       |            | Al                 | 88                 | 40  |     |    |                |     |
|          | other                      | 20%      |            |                    |                    |     |     |    |                |     |

Figure SB4. The data of copper group metals used for evaluating Vulnerability to Supply Restriction.

<sup>g</sup> refer to Nassar et al. [22].



| Elements | End-use                             |          | Importance | Substitutability |                    |     |     |     | Susceptibility | VSR |
|----------|-------------------------------------|----------|------------|------------------|--------------------|-----|-----|-----|----------------|-----|
|          | Application                         | % of use |            | NE               | Primary substitute | SPi | SAi | SP  | SA             |     |
| In       | Indium Tin Oxide thin-film coatings | 86%      | 10         | Zn               | 63                 | 58  | 63  | 58  | 21             | 30  |
|          | other                               | 14%      |            |                  |                    |     |     |     |                |     |
| Pb       | Batteries                           | 89%      | 13         | None             | 100                | 100 | 100 | 100 | 10             | 41  |
|          | other                               | 11%      |            |                  |                    |     |     |     |                |     |
| Zn       | Galvanizing                         | 48%      | 7          | Si               | 38                 | 47  | 38  | 45  | 5              | 18  |
|          | Galvanizing: other                  | 16%      |            | Si               | 38                 | 47  |     |     |                |     |
|          | Brass and Bronze                    | 14%      |            | Al               | 38                 | 40  |     |     |                |     |
|          | Zinc-based alloys                   | 10%      |            | Al               | 38                 | 40  |     |     |                |     |
|          | other                               | 13%      |            |                  |                    |     |     |     |                |     |
| Cd       | Batteriesb                          | 99%      | 0          | Li               | 13                 | 42  | 13  | 42  | 3              | 10  |
|          | Coatings                            | 0%       |            | None             | 100                | 100 |     |     |                |     |
|          | other                               | 1%       |            |                  |                    |     |     |     |                |     |
| Sn       | Solder                              | 54%      | 3          | Ag               | 38                 | 66  | 36  | 59  | 88             | 46  |
|          | Tin plate                           | 17%      |            | Al               | 13                 | 40  |     |     |                |     |
|          | Chemical                            | 13%      |            | Pb               | 63                 | 59  |     |     |                |     |
|          | Brass and Bronze                    | 5%       |            | Cu               | 38                 | 53  |     |     |                |     |
|          | other                               | 11%      |            |                  |                    |     |     |     |                |     |

Figure SB5. The data of zinc, tin, lead group metals used for evaluating Vulnerability to Supply Restriction.

| Elements | End-use        |          | Importance | Substitutability   |     |     |    |    | Susceptibility | VSR |
|----------|----------------|----------|------------|--------------------|-----|-----|----|----|----------------|-----|
|          | Application    | % of use | NE         | Primary substitute | SPi | SAi | SP | SA | IR             |     |
| Y        | Phosphors      | 69%      | 1          | None               | 100 | 100 | 97 | 88 | 100            | 64  |
|          | Ceramics       | 22%      |            | Mg                 | 88  | 50  |    |    |                |     |
|          | other          | 9%       |            |                    |     |     |    |    |                |     |
| Nd       | Nd magnets     | 76%      | 9          | Sm                 | 38  | 64  | 41 | 62 | 100            | 53  |
|          | Metallurgy     | 8%       |            | Mg                 | 63  | 50  |    |    |                |     |
|          | Battery alloys | 5%       |            | Li                 | 38  | 42  |    |    |                |     |
|          | Ceramics       | 4%       |            | Ce                 | 63  | 62  |    |    |                |     |
|          | Autocatalysts  | 1%       |            | Ce                 | 38  | 62  |    |    |                |     |
|          | other          | 6%       |            |                    |     |     |    |    |                |     |
| Dy       | Nd magnets     | 100%     | 12         | Tb                 | 38  | 66  | 38 | 66 | 100            | 54  |

Figure SB6. The data of rare earth elements used for evaluating Vulnerability to Supply Restriction.

| Elements | End-use                              |          | Importance | Substitutability      |     |     |    |    | Susceptibility | VSR |
|----------|--------------------------------------|----------|------------|-----------------------|-----|-----|----|----|----------------|-----|
|          | Application                          | % of use | NE         | Primary substitute    | SPi | SAi | SP | SA | IR             |     |
| Zr       | Refractory                           | 36%      | 0          | Mg                    | 63  | 50  | 78 | 69 | 100            | 58  |
|          | Ceramics                             | 15%      |            | Al                    | 63  | 40  |    |    |                |     |
|          | Catalysts                            | 35%      |            | None                  | 100 | 100 |    |    |                |     |
|          | other                                | 14%      |            |                       |     |     |    |    |                |     |
| Hf       | superalloys: aerospace               | 39%      | 0          | Zr                    | 38  | 67  | 38 | 67 | 100            | 51  |
|          | Nuclear energy control rod           | 16%      |            | Ag-In-Cd <sup>h</sup> | 38  | 68  |    |    |                |     |
|          | superalloys: fuel reprocessing plant | 13%      |            | Zr                    | 38  | 67  |    |    |                |     |
|          | refractory                           | 13%      |            | Zr                    | 38  | 67  |    |    |                |     |
|          | plasma cutting tool                  | 9%       |            | Zr                    | 38  | 67  |    |    |                |     |
|          | other                                | 10%      |            |                       |     |     |    |    |                |     |

Figure SB7. The data of nuclear energy metals used for evaluating Vulnerability to Supply Restriction.

<sup>h</sup> Ag: 80%, In: 15%, Cd: 5% [63].

| Elements | Supply Risk |     |     |     |        |     | SR |
|----------|-------------|-----|-----|-----|--------|-----|----|
|          | GTE         |     | S&R |     | GP     |     |    |
|          | RPt         | CMF | PPI | HDI | WGI-PV | GSC |    |
| Li       | 0           | 25  | 26  | 86  | 34     | 80  | 42 |
| Na       | 0           | 0   | 37  | 81  | 53     | 61  | 39 |
| Ce       | 0           | 88  | 50  | 75  | 68     | 96  | 63 |
| Sm       | 0           | 91  | 52  | 74  | 71     | 98  | 64 |
| Tb       | 0           | 96  | 53  | 73  | 72     | 99  | 66 |
| Pt       | 0           | 16  | 48  | 69  | 62     | 86  | 47 |
| Au       | 94          | 12  | 40  | 76  | 58     | 50  | 55 |
| Bi       | 83          | 90  | 53  | 74  | 70     | 90  | 77 |
| Lime     | 0           | 0   | 51  | 76  | 65     | 85  | 46 |
| talc     | 0           | 0   | 42  | 77  | 59     | 67  | 41 |
| Plastic  | 67          | 100 | 41  | 83  | 56     | 55  | 67 |
| wood     | 0           | 0   | 42  | 72  | 61     | 46  | 37 |

Figure SC. The Supply Risk results of substitute metals for evaluating Substitute Availability.
